# Supplementary material
Source: MDPI journal article supplement (https://www.mdpi.com/2813-0391/1/2/26)
Supplement: s1 [file s1]

# Supplementary Material

## Conversion of Waste Synthesis Gas to Desalination Catalyst at Ambient Temperatures

David D. J. Antia

DCA Consultants Ltd., The Bungalow, Castleton Farm, Falkirk, FK2 8SD, UK;  
dcacl@btconnect.com

### List of Contents

1. **Figure S1.** USA. Carbon monoxide relationships.
2. **Figure S2.** USA. Carbon dioxide relationships.
3. **Figure S3.** USA. Methane and Hydrogen relationships.
4. **Figure S4.** EPB. Carbon monoxide relationships.
5. **Figure S5.** EPB. Carbon dioxide relationships.
6. **Figure S6.** EPB. Methane and Hydrogen relationships.
7. **Figure S7.** USA Hydrocarbon compositions in the product gas.
8. **Figure S8.** EPB. Hydrocarbon Product Compositions.
9. **Figure S9.** EPB. Composition of the generated hydrocarbons in the product gas

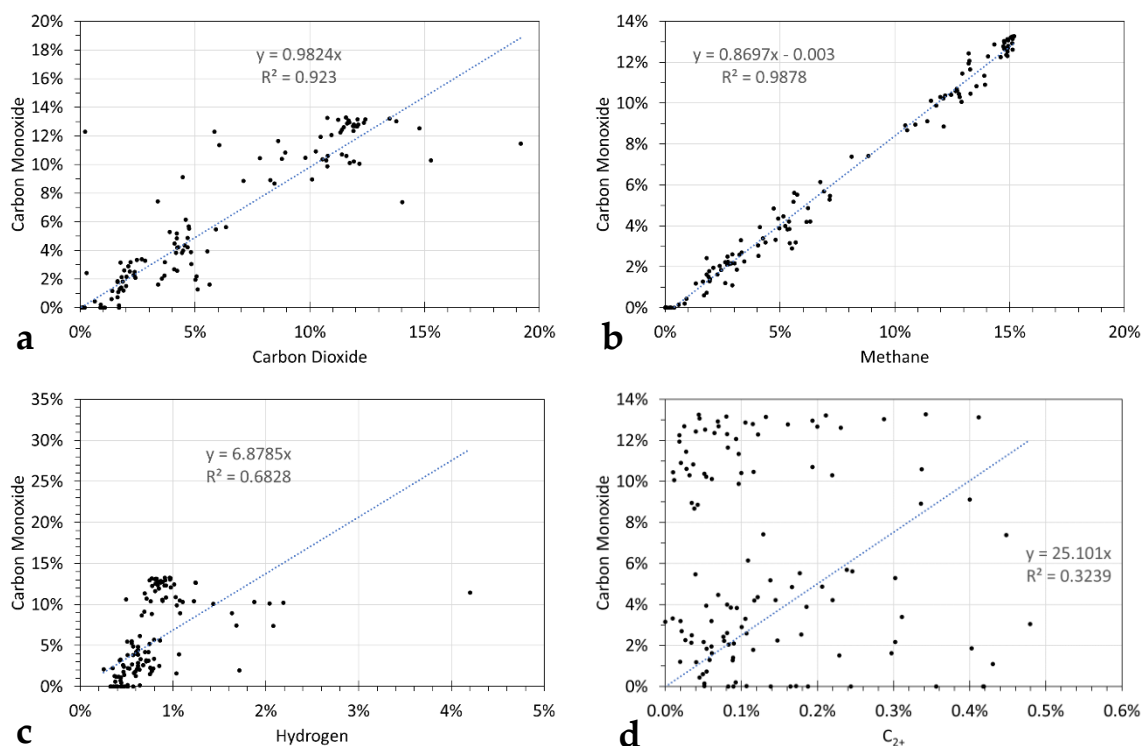

**Figure S1.** USA. Carbon monoxide relationships. All molar proportions are normalised to a N<sub>2</sub> concentration in the feed gas of 46.03%. (a), CO<sub>2</sub> vs. CO; (b), CH<sub>4</sub> vs. CO; (c), H<sub>2</sub> vs. CO; (d), CH<sub>4</sub> vs. CO.

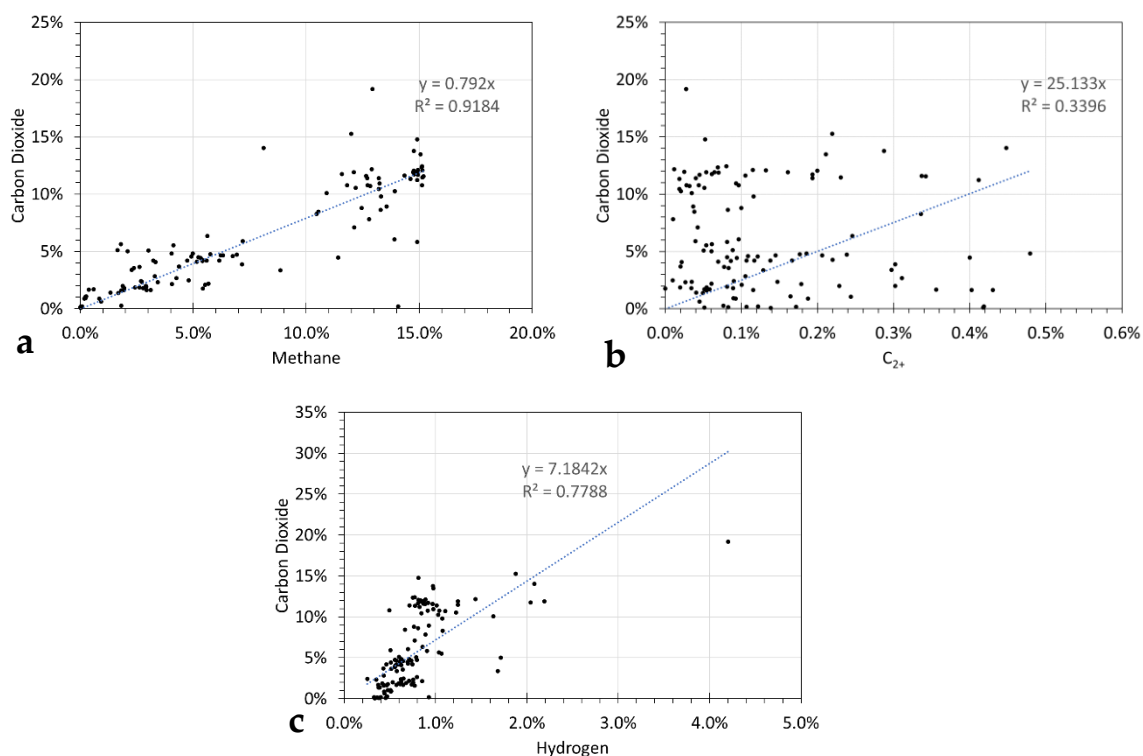

**Figure S2.** USA. Carbon dioxide relationships. All molar proportions are normalised to a  $N_2$  concentration in the feed gas of 46.03%. (a),  $CH_4$  vs.  $CO_2$ ; (b),  $C_{2+}$  vs.  $CO_2$ ; (c),  $H_2$  vs.  $CO_2$ .

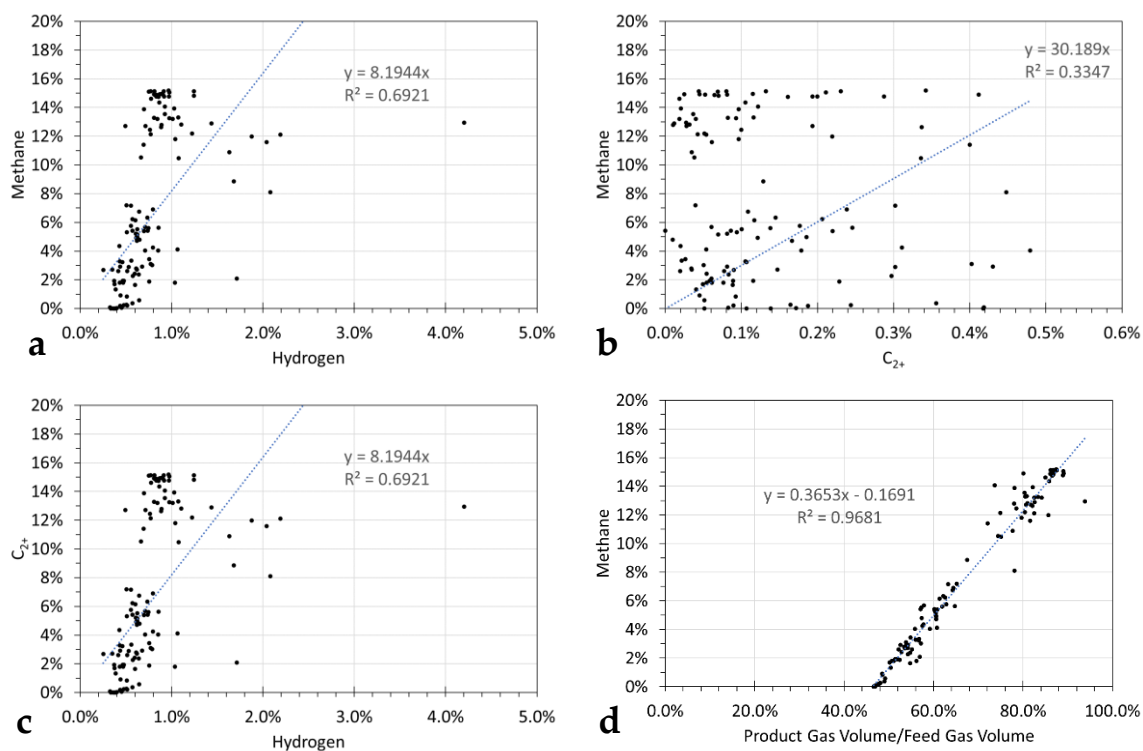

**Figure S3.** USA. Methane and Hydrogen relationships. All molar proportions are normalised to a  $N_2$  concentration in the feed gas of 46.03%. (a),  $H_2$  vs.  $CH_4$ ; (b),  $C_{2+}$  vs.  $CH_4$ ; (c),  $H_2$  vs.  $C_{2+}$ ; (d), [product gas volume/feed gas volume] vs.  $CH_4$ .

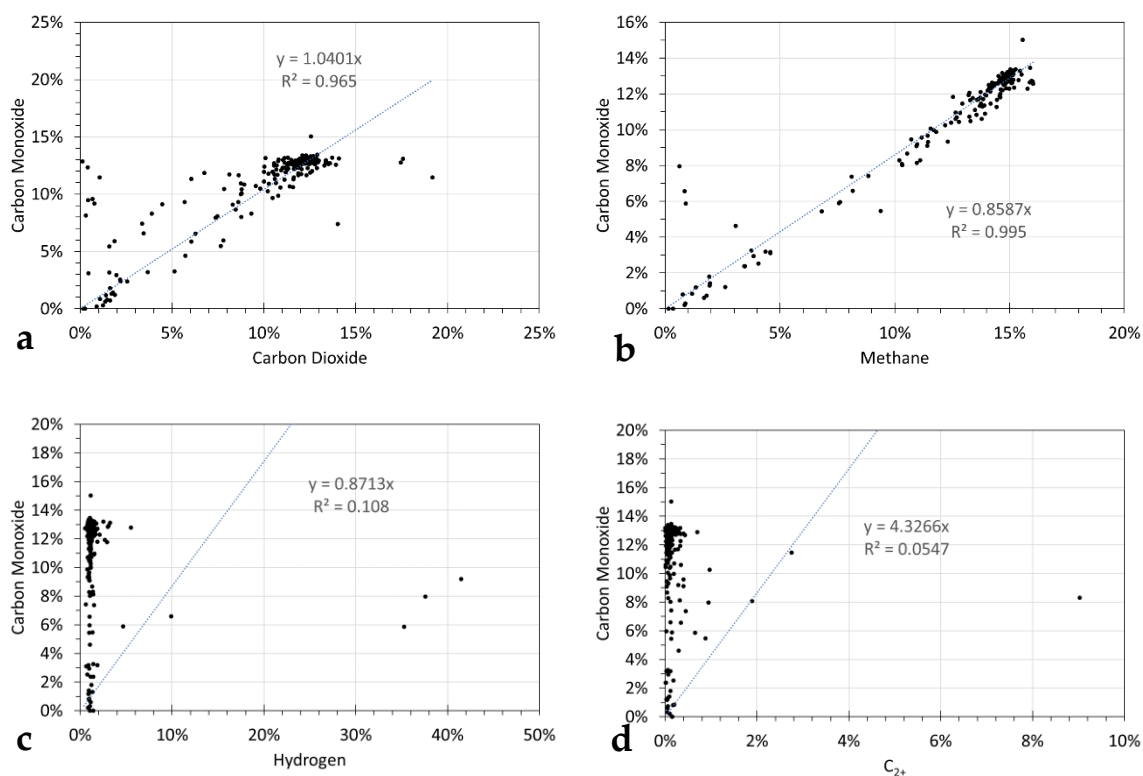

**Figure S4.** EPB. Carbon monoxide relationships. All molar proportions are normalised to a  $N_2$  concentration in the feed gas of 46.03%. (a),  $CO_2$  vs. CO; (b),  $CH_4$  vs. CO; (c),  $H_2$  vs. CO; (d),  $CH_4$  vs. CO.

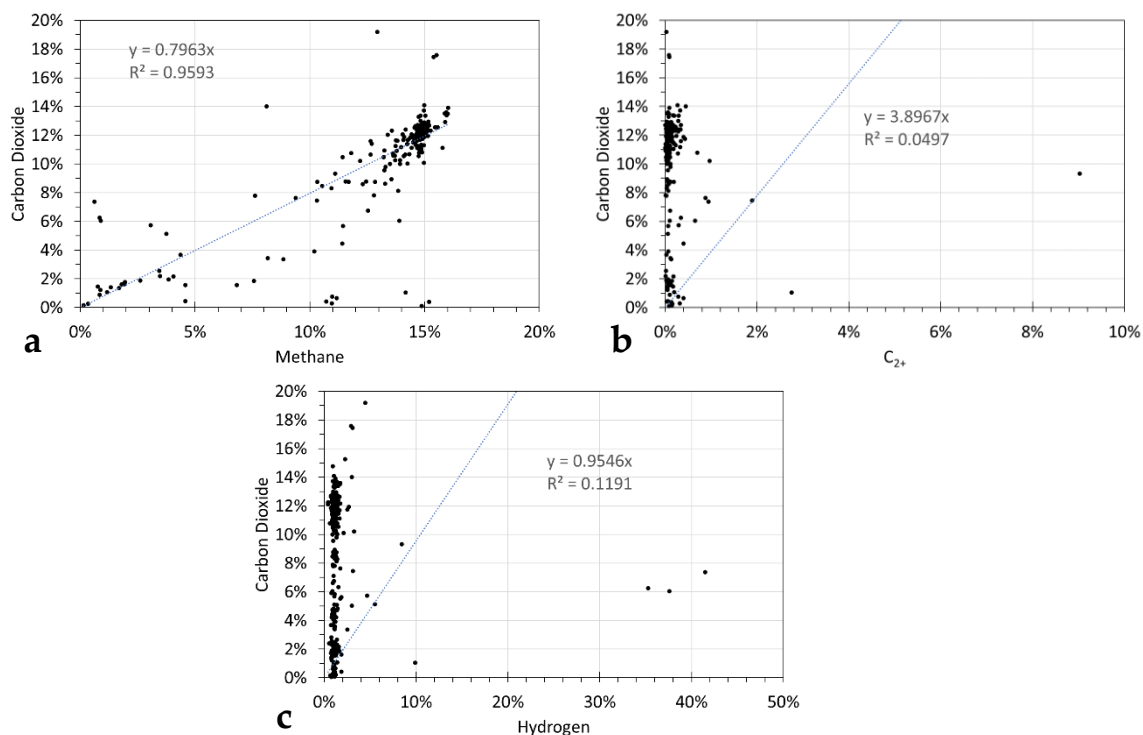

**Figure S5.** EPB. Carbon dioxide relationships. All molar proportions are normalised to a  $N_2$  concentration in the feed gas of 46.03%. (a),  $CH_4$  vs.  $CO_2$ ; (b),  $C_{2+}$  vs.  $CO_2$ ; (c),  $H_2$  vs.  $CO_2$ .

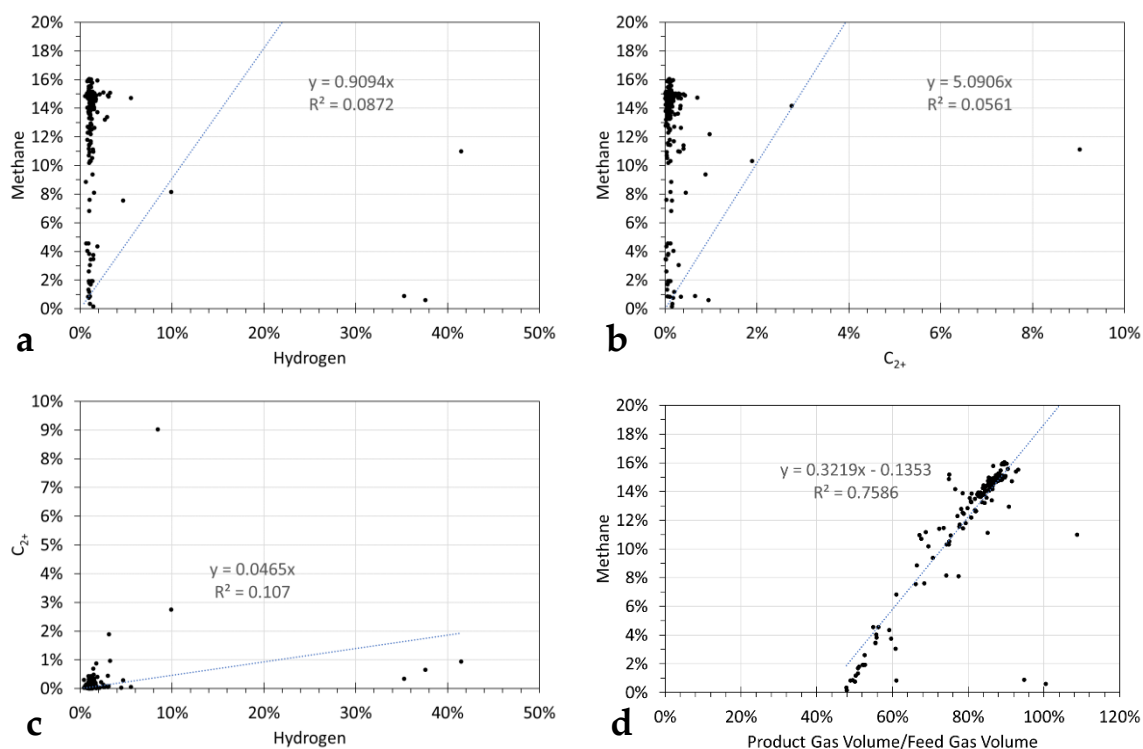

**Figure S6.** EPB. Methane and Hydrogen relationships. All molar proportions are normalised to a  $N_2$  concentration in the feed gas of 46.03%. a),  $H_2$  vs.  $CH_4$ ; (b),  $C_{2+}$  vs.  $CH_4$ ; (c),  $H_2$  vs.  $C_{2+}$ ; (d), [product gas volume/feed gas volume] vs.  $CH_4$ .

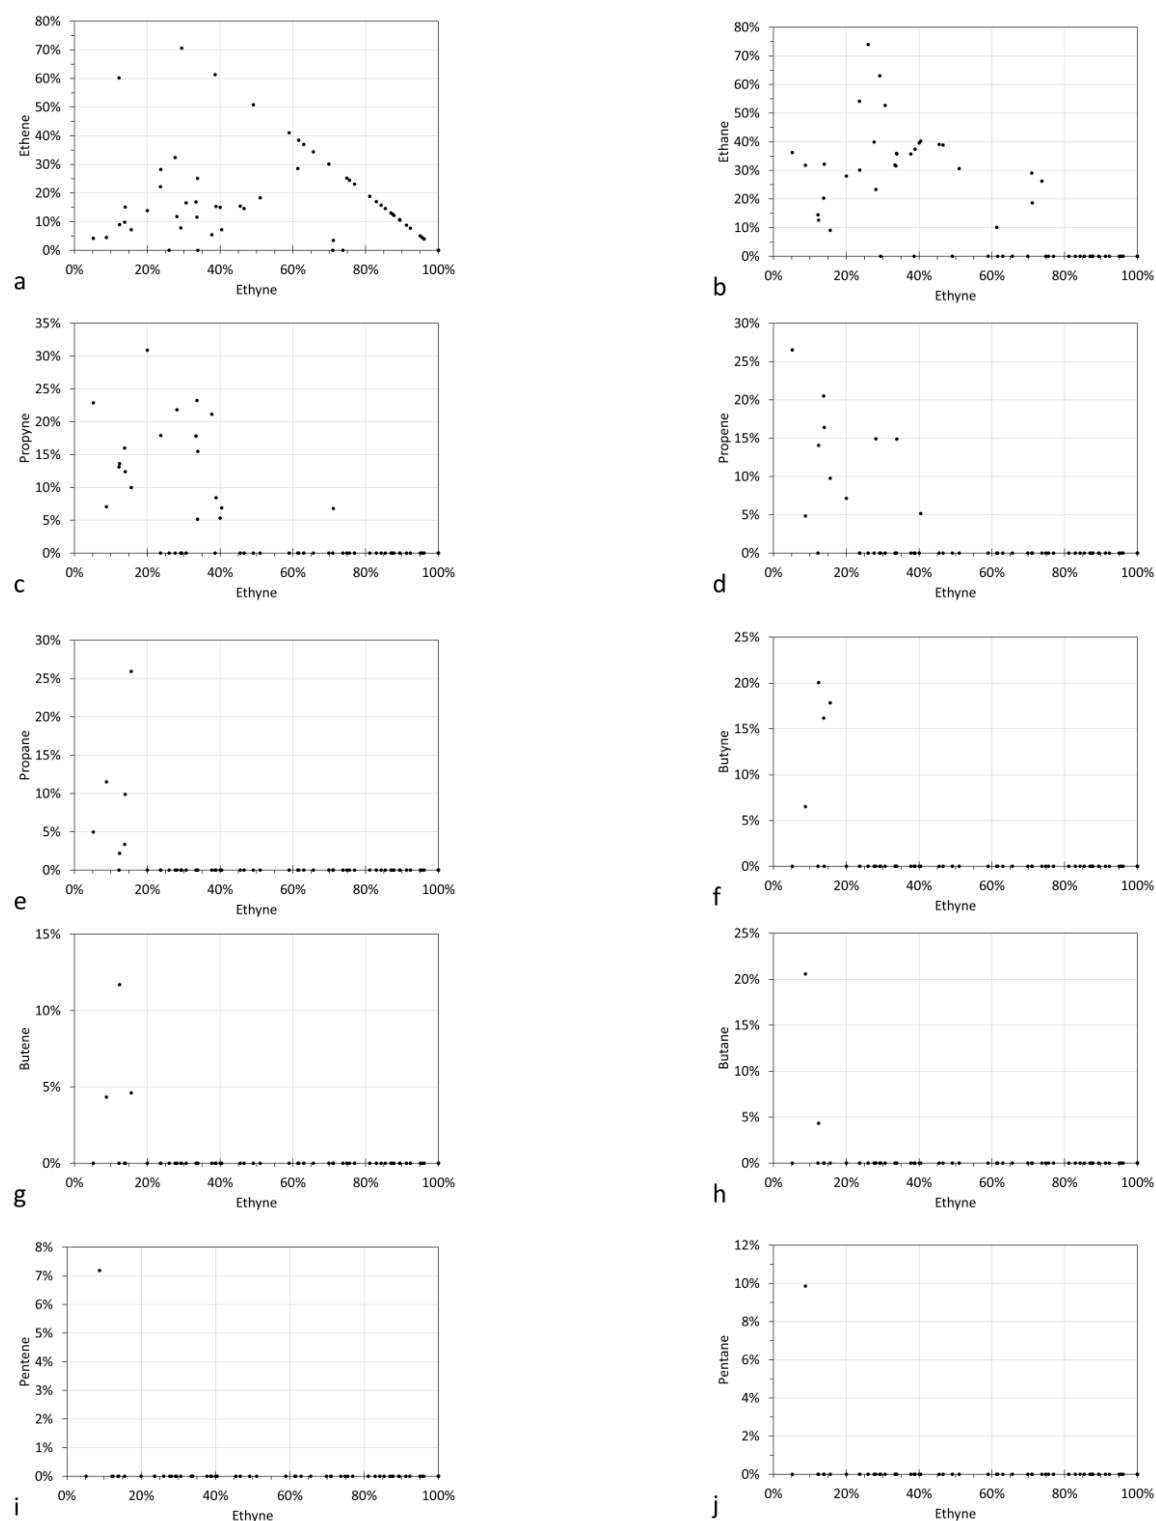

**Figure S7.** USA Hydrocarbon compositions in the product gas. (a), Ethyne vs. Ethene; (b), Ethyne vs. Ethane; (c), Ethyne vs. Propyne; (d), Ethyne vs. Propene; (e), Ethyne vs. Propane; (f), Ethyne vs. Butyne; (g), Ethyne vs. Butene; (h), Ethyne vs. Butane; (i), Ethyne vs. Pentene; (j), Ethyne vs. Pentane.

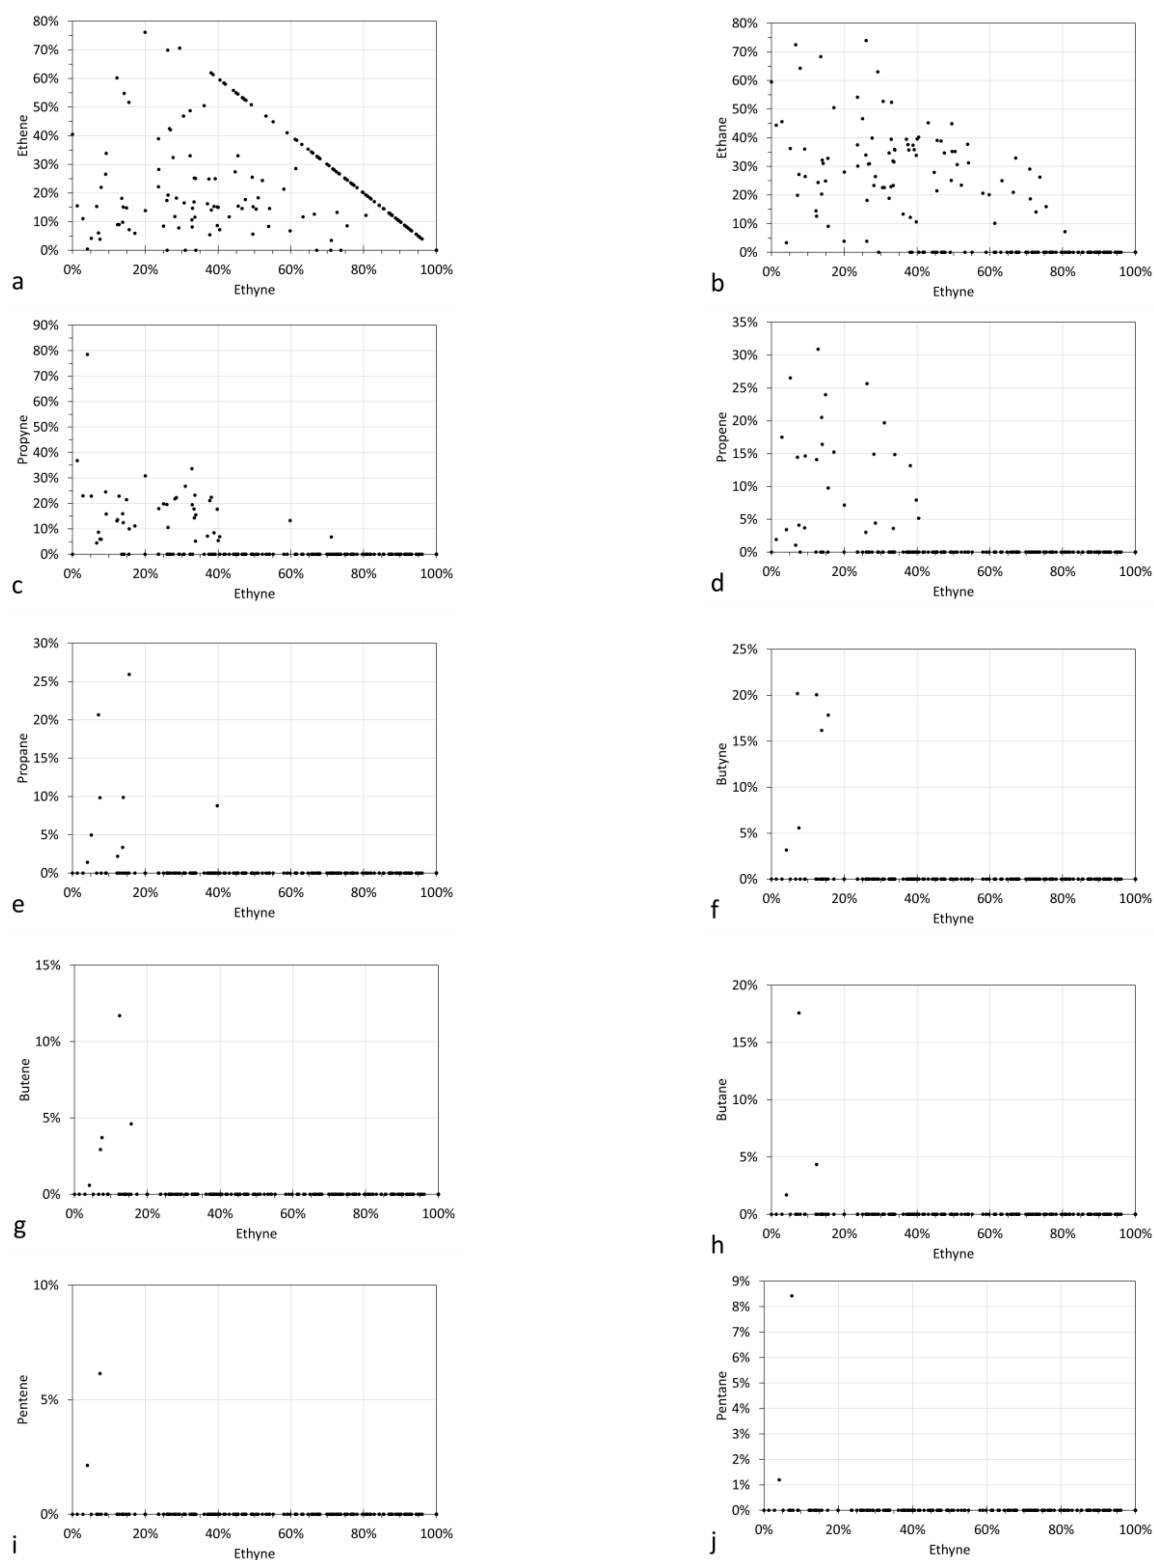

**Figure S8.** EPB. Hydrocarbon Product Compositions. (a), Ethyne vs. Ethene; (b), Ethyne vs. Ethane; (c), Ethyne vs. Propyne; (d), Ethyne vs. Propene; (e), Ethyne vs. Propane; (f), Ethyne vs. Butyne; (g), Ethyne vs. Butene; (h), Ethyne vs. Butane; (i), Ethyne vs. Pentene; (j), Ethyne vs. Pentane.

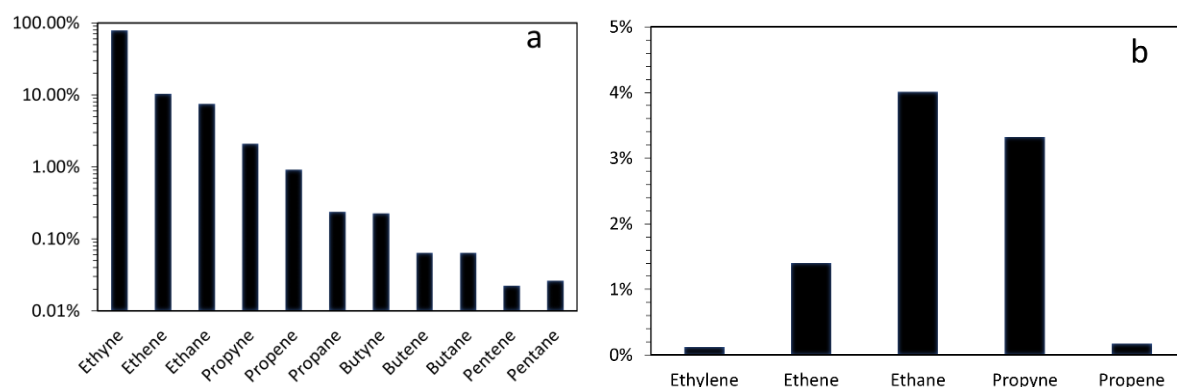

**Figure S9.** EPB. Composition of the generated C<sub>2</sub><sup>+</sup> hydrocarbons in the product gas. (a), Average product composition; Composition normalized to the C<sub>2</sub><sup>+</sup> composition in the product gas. Average of 373 measurements; (b), composition of the largest volume hydrocarbon pulse recorded. Composition normalised to N<sub>2</sub> concentration in the product gas.
